# Supplementary material
Source: publisher site journal article supplement (https://www.spandidos-publications.com/5756/downloadSupplementary)
Supplement: Supplementary file 1 [file downloadSupplementary]

## Sheet: Sheet1
Table SIII. Differentially expressed genes of mitochondrial electron transport chain.
Gene_ID	Name	log2FC	P-adjusted
ENSMUSG00000025488	Cox8b	-3.89187	0.0200341
ENSMUSG00000064356	Mt-Atp8	-2.50087	0.00104415
ENSMUSG00000064357	Mt-Atp6	-1.56508	3.97106e-05
ENSMUSG00000050856	Atp5k	-1.20963	0.00169183
ENSMUSG00000016427	Ndufa1	-1.17062	4.70549e-08
ENSMUSG00000021606	Ndufs6	-1.13499	2.8883e-08
ENSMUSG00000064354	Mt-Co2	-0.963278	0.000275272
ENSMUSG00000035674	Ndufa3	-0.959547	4.65574e-06
ENSMUSG00000020163	Uqcr11	-0.9433	0.00045858
ENSMUSG00000074218	Cox7a1	-0.940027	0.0175735
ENSMUSG00000020544	Cox11	-0.8968	2.94255e-05
ENSMUSG00000071014	Ndufb6	-0.892616	5.92557e-05
ENSMUSG00000014294	Ndufa2	-0.892078	1.88136e-05
ENSMUSG00000024038	Ndufv3	-0.842509	2.46472e-05
ENSMUSG00000044894	Uqcrq	-0.70487	0.000295974
ENSMUSG00000026032	Ndufb3	-0.684174	7.92056e-05
ENSMUSG00000061518	Cox5b	-0.62214	0.00627068
ENSMUSG00000025204	Ndufb8	-0.613621	0.00345375
ENSMUSG00000038023	Atp6v0a2	-0.586875	9.68995e-10
ENSMUSG00000037916	Ndufv1	-0.572512	0.00178488
ENSMUSG00000003072	Atp5d	-0.563991	0.00210885
ENSMUSG00000035885	Cox8a	-0.547196	0.000584126
ENSMUSG00000026895	Ndufa8	-0.524771	0.00183485
ENSMUSG00000036751	Cox6b1	-0.51694	0.018022
ENSMUSG00000021520	Uqcrb	-0.503275	0.0243159
ENSMUSG00000006057	Atp5g1	-0.492694	0.00162229
ENSMUSG00000022956	Atp5o	-0.474749	0.0343426
ENSMUSG00000030647	Ndufc2	-0.47267	0.0114238
ENSMUSG00000037152	Ndufc1	-0.470409	0.00271083
ENSMUSG00000041697	Cox6a1	-0.469344	0.0085939
ENSMUSG00000040018	Cox15	-0.461651	0.00045858
ENSMUSG00000020089	Ppa1	-0.454459	0.00978848
ENSMUSG00000022820	Ndufb4	-0.45074	0.0011496
ENSMUSG00000040048	Ndufb10	-0.445951	0.0476688
ENSMUSG00000036199	Ndufa13	-0.434316	0.00884027
ENSMUSG00000029632	Ndufa4	-0.429945	0.016767
ENSMUSG00000022551	Uqcrc1	-0.429817	0.00976102
ENSMUSG00000038462	Uqcrfs1	-0.42595	0.0104426
ENSMUSG00000016252	Atp5e	-0.413403	0.0041748
ENSMUSG00000028648	Ndufs5	-0.40904	0.0275575
ENSMUSG00000000088	Cox5a	-0.408555	0.0161302
ENSMUSG00000042148	Cox10	-0.404012	0.0026159
ENSMUSG00000052459	Atp6v1a	-0.393825	0.0431444
ENSMUSG00000033379	Atp6v0b	-0.376884	0.00810771
ENSMUSG00000025651	Uqcrc1	-0.374197	0.0424303
ENSMUSG00000017778	Cox7c	-0.358487	0.00597375
ENSMUSG00000059534	Uqcr10	-0.355928	0.0323755
ENSMUSG00000004285	Atp6v1f	-0.349992	0.0367604
ENSMUSG00000033938	Ndufb7	-0.343331	0.0287151
ENSMUSG00000025393	Atp5b	-0.328621	0.043161
ENSMUSG00000032330	Cox7a2	-0.314146	0.0276922
ENSMUSG00000022890	Atp5j	-0.279203	0.0402156
ENSMUSG00000022450	Ndufa6	-0.254533	0.0424303
